# Supplementary material
Source: Springer Nature journal article supplement (https://www.springermedizin.de/resource/supplementary/12936_2012_2144_MOESM2_ESM.pdf/9542650)
Supplement: MOESM2 [file 9542650]

Nurse and laboratory  
technologist visit the  
school

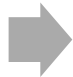

Children enrolled in  
the study pulled out of  
their classroom and  
taken to the screening  
room

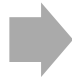

Children are registered  
and nurse checks for  
absentees

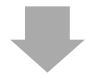

Children wait in the  
room for 20 minutes  
for RDT results.  
Negative cases sent  
back to their  
classrooms & positive  
cases retained

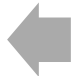

Laboratory  
Technologist takes  
finger prick blood  
samples to test for  
malaria parasitemia  
using RDT.

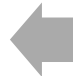

Nurse takes children's  
weight and  
temperature

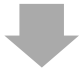

RDT positive children  
fed on milk and  
biscuits

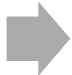

Nurse provides the  
first treatment dose  
and observes the  
children for half an  
hour for any side  
effects

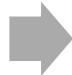

Children are released  
back to their  
classrooms

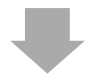

Nurse returns on day  
two and three to  
provide third and fifth  
doses

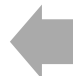

Nurse gives the  
evening doses of the  
drug (2nd, 4th and 6th  
doses) to the parent, an  
older sibling or to the  
child
